# Supplementary material
Source: Copernicus journal article supplement (doi:10.5194/ejm-38-237-2026)

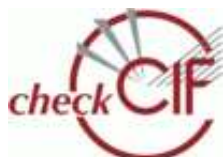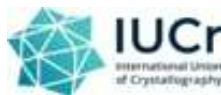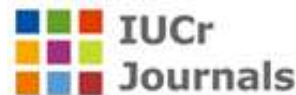

## checkCIF/PLATON report

You have not supplied any structure factors. As a result the full set of tests cannot be run.

THIS REPORT IS FOR GUIDANCE ONLY. IF USED AS PART OF A REVIEW PROCEDURE FOR PUBLICATION, IT SHOULD NOT REPLACE THE EXPERTISE OF AN EXPERIENCED CRYSTALLOGRAPHIC REFEREE.

No syntax errors found.      CIF dictionary      Interpreting this report

### Datablock: erzwiesite

---

|                 |                            |                            |             |
|-----------------|----------------------------|----------------------------|-------------|
| Bond precision: | Pb- S = 0.0110 Å           | Wavelength=0.71073         |             |
| Cell:           | a=4.085 (5)                | b=13.462 (15)              | c=33.92 (4) |
|                 | alpha=90                   | beta=90                    | gamma=90    |
| Temperature:    | 293 K                      |                            |             |
|                 | Calculated                 | Reported                   |             |
| Volume          | 1865 (4)                   | 1866 (4)                   |             |
| Space group     | C m c m                    | C m c m                    |             |
| Hall group      | -C 2c 2                    | -C 2c 2                    |             |
| Moiety formula  | Ag8.64 Bi16.32 Pb11.04 S40 | ?                          |             |
| Sum formula     | Ag8.64 Bi16.32 Pb11.04 S40 | Ag8.23 Bi16.31 Pb11.43 S40 |             |
| Mr              | 7912.44                    | 7946.82                    |             |
| Dx, g cm-3      | 7.045                      | 7.074                      |             |
| Z               | 1                          | 1                          |             |
| Mu (mm-1)       | 66.477                     | 67.207                     |             |
| F000            | 3305.9                     | 3318.0                     |             |
| F000'           | 3210.77                    |                            |             |
| h, k, lmax      | 4, 13, 33                  | 4, 13, 34                  |             |
| Nref            | 583                        | 352                        |             |
| Tmin, Tmax      | 0.037, 0.095               | 0.050, 0.110               |             |
| Tmin'           | 0.002                      |                            |             |

Correction method= # Reported T Limits: Tmin=0.050 Tmax=0.110  
AbsCorr = EMPIRICAL

Data completeness= 0.604

Theta(max)= 20.842

R(reflections)= 0.0524( 308)

wR2(reflections)=  
0.1232( 352)

S = 1.138

Npar= 51

---

The following ALERTS were generated. Each ALERT has the format

**test-name\_ALERT\_alert-type\_alert-level.**

Click on the hyperlinks for more details of the test.

---

### Alert level A

THETM01\_ALERT\_3\_A The value of sine(theta\_max)/wavelength is less than 0.550  
Calculated sin(theta\_max)/wavelength = 0.5006

---

### Alert level C

ABSTY02\_ALERT\_1\_C An \_exptl\_absorpt\_correction\_type has been given without  
a literature citation. This should be contained in the  
\_exptl\_absorpt\_process\_details field.

Absorption correction given as empirical

PLAT018\_ALERT\_1\_C \_diffn\_measured\_fraction\_theta\_max .NE. \*\_full ! Check

PLAT041\_ALERT\_1\_C Calc. and Reported SumFormula Strings Differ Please Check

Calc: Ag8.64 Bi16.32 Pb11.04 S40

Rep.: Ag8.23 Bi16.31 Pb11.43 S40

PLAT043\_ALERT\_1\_C Calculated and Reported Mol. Weight Differ by .. 34.38 Check

PLAT051\_ALERT\_1\_C Mu(calc) and Mu(cif) Ratio Differs from 1.0 by . 1.09 %

PLAT068\_ALERT\_1\_C Reported F000 Differs from Calcd (or Missing)... Please Check

PLAT077\_ALERT\_4\_C Unit-Cell Contains Non-integer Number of Atoms . Please Check

PLAT148\_ALERT\_3\_C s.u. on the a - Axis is (Too) Large .... 0.005 Ang.

PLAT148\_ALERT\_3\_C s.u. on the b - Axis is (Too) Large .... 0.0150 Ang.

PLAT148\_ALERT\_3\_C s.u. on the c - Axis is (Too) Large .... 0.040 Ang.

S2 S3 S4 S5 S6

PLAT241\_ALERT\_2\_C High MainResAtom Ueq as Compared to Neighbours S1 Check

PLAT250\_ALERT\_2\_C Large U3/U1 Ratio for <U(i,j)> Tensor(Resd 1) 3.3 Note

---

### Alert level G

FORMU01\_ALERT\_2\_G There is a discrepancy between the atom counts in the  
\_chemical\_formula\_sum and the formula from the \_atom\_site\* data.

Atom count from \_chemical\_formula\_sum: Ag8.23 Bi16.31 Pb11.43 S40

Atom count from the \_atom\_site data: Ag8.64 Bi16.32 Pb11.04 S40

CELLZ01\_ALERT\_1\_G Difference between formula and atom\_site contents detected.

CELLZ01\_ALERT\_1\_G ALERT: Large difference may be due to a

symmetry error - see SYMMG tests

From the CIF: \_cell\_formula\_units\_Z 1

From the CIF: \_chemical\_formula\_sum Ag8.23 Bi16.31 Pb11.43 S40

TEST: Compare cell contents of formula and atom\_site data

| atom | Z*formula | cif sites | diff  |
|------|-----------|-----------|-------|
| Ag   | 8.23      | 8.64      | -0.41 |
| Bi   | 16.31     | 16.32     | -0.01 |
| Pb   | 11.43     | 11.04     | 0.39  |
| S    | 40.00     | 40.00     | 0.00  |

|                   |                                                  |       |              |
|-------------------|--------------------------------------------------|-------|--------------|
| PLAT004_ALERT_5_G | Polymeric Structure Found with Maximum Dimension | 3     | Info         |
| PLAT083_ALERT_2_G | SHELXL Second Parameter in WGHT Unusually Large  | 63.32 | Why ?        |
| PLAT168_ALERT_4_G | The CIF-Embedded .res File Contains EXYZ Records | 3     | Report       |
| PLAT171_ALERT_4_G | The CIF-Embedded .res File Contains EADP Records | 3     | Report       |
| PLAT199_ALERT_1_G | Reported _cell_measurement_temperature ..... (K) | 293   | Check        |
| PLAT200_ALERT_1_G | Reported _diffrn_ambient_temperature ..... (K)   | 293   | Check        |
| PLAT301_ALERT_3_G | Main Residue Disorder .....(Resd 1)              | 44%   | Note         |
| PLAT794_ALERT_5_G | Tentative Bond Valency for Bi1 (III)             | 2.91  | Info         |
| PLAT794_ALERT_5_G | Tentative Bond Valency for Pb2 (II)              | 1.96  | Info         |
| PLAT811_ALERT_5_G | No ADDSYM Analysis: Too Many Excluded Atoms .... | 7     | Info         |
| PLAT883_ALERT_1_G | Absent Datum for _atom_sites_solution_primary .. |       | Please Do !  |
| PLAT933_ALERT_2_G | Number of HKL-OMIT Records in Embedded .res File | 150   | Note         |
|                   | 2 6 5, 2 2 1, 2 0 8, 2 4 7, 1 1 17,              | 3     | 1 22,        |
|                   | 2 2 2, 1 11 1, 2 2 3, 0 6 15, 1 7 9,             | 2     | 6 14,        |
|                   | 4 2 4, 2 10 12, 1 1 16, 2 2 7, 1 9 21,           | 2     | 4 4,         |
|                   | 1 1 22, 2 2 0, 3 1 12, 0 4 14, 0 6 29,           | 1     | 5 15,        |
|                   | 3 5 3, 1 7 23, 2 4 13, 1 11 0, 1 9 0,            | 1     | 7 13,        |
|                   | 0 4 15, 0 2 20, 0 6 7, 3 1 9, 1 5 14,            | 0     | 8 25,        |
|                   | 0 0 20, 3 7 9, 2 2 9, 3 7 11, 2 10 0,            | 3     | 9 3,         |
|                   | 3 7 4, 1 11 17, 2 4 9, 2 6 2, 4 2 1,             | 3     | 1 7,         |
|                   | 3 3 9, 2 4 15,                                   |       |              |
|                   | ( 100 More NOT listed: see .ckf listing file)    |       |              |
| PLAT941_ALERT_3_G | Average HKL Measurement Multiplicity .....       | 4.1   | Low          |
| PLAT965_ALERT_2_G | The SHELXL WEIGHT Optimisation has not Converged |       | Please Check |
| PLAT994_ALERT_1_G | SHELXL .ins Contains no or MERG 0 Instruction .. |       | ! Note       |

- 
- 1 **ALERT level A** = Most likely a serious problem - resolve or explain  
0 **ALERT level B** = A potentially serious problem, consider carefully  
12 **ALERT level C** = Check. Ensure it is not caused by an omission or oversight  
18 **ALERT level G** = General information/check it is not something unexpected
- 12 ALERT type 1 CIF construction/syntax error, inconsistent or missing data  
6 ALERT type 2 Indicator that the structure model may be wrong or deficient  
6 ALERT type 3 Indicator that the structure quality may be low  
3 ALERT type 4 Improvement, methodology, query or suggestion  
4 ALERT type 5 Informative message, check
- 

It is advisable to attempt to resolve as many as possible of the alerts in all categories. Often the minor alerts point to easily fixed oversights, errors and omissions in your CIF or refinement strategy, so attention to these fine details can be worthwhile. It is up to the individual to critically assess their own results and, if necessary, seek expert advice.

### Validation response form

Please find below a validation response form (VRF) that can be filled in and pasted into your CIF.

```
# start Validation Reply Form
_vrf_THETM01_erzwiesite
;
PROBLEM: The value of sine(theta_max)/wavelength is less than 0.550
RESPONSE: ...
;
_vrf_ABSTY02_erzwiesite
```

```

;
PROBLEM: An _exptl_absorpt_correction_type has been given without
RESPONSE: ...
;
_vrf_PLAT018_erzwiesite
;
PROBLEM: _diffn_measured_fraction_theta_max .NE. *_full           ! Check
RESPONSE: ...
;
_vrf_PLAT041_erzwiesite
;
PROBLEM: Calc. and Reported SumFormula      Strings      Differ      Please Check
RESPONSE: ...
;
_vrf_PLAT043_erzwiesite
;
PROBLEM: Calculated and Reported Mol. Weight Differ by ..        34.38 Check
RESPONSE: ...
;
_vrf_PLAT051_erzwiesite
;
PROBLEM: Mu(calc) and Mu(cif) Ratio Differs from 1.0 by .        1.09 %
RESPONSE: ...
;
_vrf_PLAT068_erzwiesite
;
PROBLEM: Reported F000 Differs from Calcd (or Missing)...        Please Check
RESPONSE: ...
;
_vrf_PLAT077_erzwiesite
;
PROBLEM: Unit-Cell Contains Non-integer Number of Atoms .        Please Check
RESPONSE: ...
;
_vrf_PLAT148_erzwiesite
;
PROBLEM: s.u. on the          a          - Axis is (Too) Large ....    0.005 Ang.
RESPONSE: ...
;
_vrf_PLAT241_erzwiesite
;
PROBLEM: High MainResAtom Ueq as Compared to Neighbours          S1 Check
RESPONSE: ...
;
_vrf_PLAT250_erzwiesite
;
PROBLEM: Large U3/U1 Ratio for <U(i,j)> Tensor(Resd      1)        3.3 Note
RESPONSE: ...
;
# end Validation Reply Form

```

## duplicate check

A reduced cell check using CCDC's cellCheckCSD service has found that one or more structures in this CIF are similar to those previously published in the CSD or the ICSD.

### DATABLOCK: erzwiesite

- ICSD number: 169940

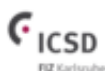

[Cell Parameters for 169940: 4.084,13.453,33.932(90,90,90)]

Datablock erzwiesite - ellipsoid plot

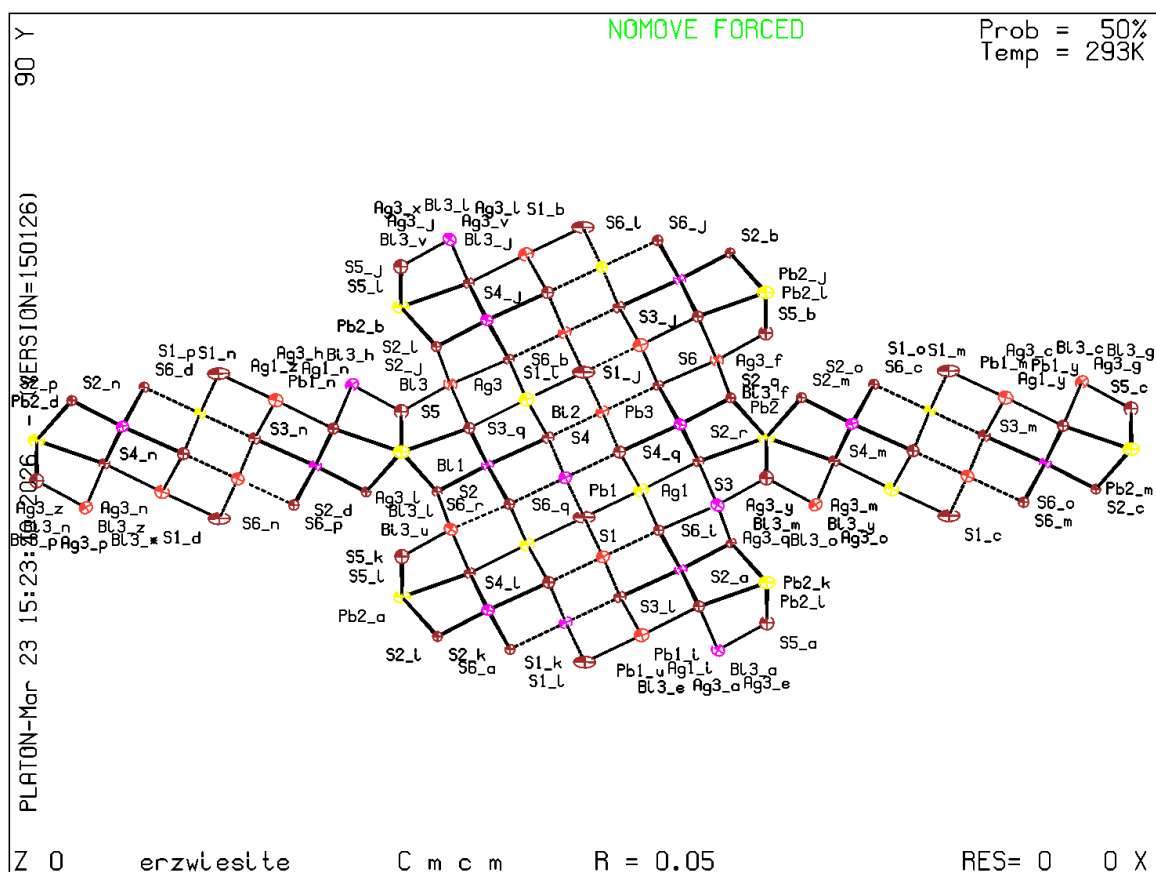

Supplement: Supplementary file 1 [file S3 erzwiesite checkcif.pdf › S3 erzwiesite checkcif.pdf]
