# Supplementary material
Source: Copernicus journal article supplement (doi:10.5194/ejm-38-237-2026)
Supplement: Supplementary file [file ejm-38-237-2026-supplement-title-page.pdf › ejm-38-237-2026-supplement-title-page.pdf]

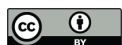

*Supplement of*

**Erzwiesite,  $\text{Ag}_8\text{Pb}_{12}\text{Bi}_{16}\text{S}_{40}$ , the natural orthorhombic  
 $N = 8$  member of the lillianite homologous series**

**Dan Topa et al.**

*Correspondence to:* Dan Topa ([dan.topa@nhm.at](mailto:dan.topa@nhm.at))

- [ejm-38-237-2026-supplement-title-page.pdf](#)
- [S1 erzwiesite.cif](#)
- [S2 erzwiesite.fcf](#)
- [S3 erzwiesite checkcif.pdf](#)

The copyright of individual parts of the supplement might differ from the article licence.
